# Supplementary material for: Functional Gene Knockout of NRF2 Increases Chemosensitivity of Human Lung Cancer A549 Cells In Vitro and in a Xenograft Mouse Model
Source: PubMed Central journal article supplement — Mol Ther Oncolytics. 2018 Oct 18;11:75–89. doi: 10.1016/j.omto.2018.10.002 (PMC6251792; doi:10.1016/j.omto.2018.10.002), 2018-10-18
Supplement: mmc1.pdf [file mmc1.pdf]

OMTO, Volume 11

## Supplemental Information

### **Functional Gene Knockout of *NRF2* Increases Chemosensitivity of Human Lung Cancer A549 Cells *In Vitro* and in a Xenograft Mouse Model**

**Pawel Bialk, Yichen Wang, Kelly Banas, and Eric B. Kmiec**

## Supplemental Figure 1

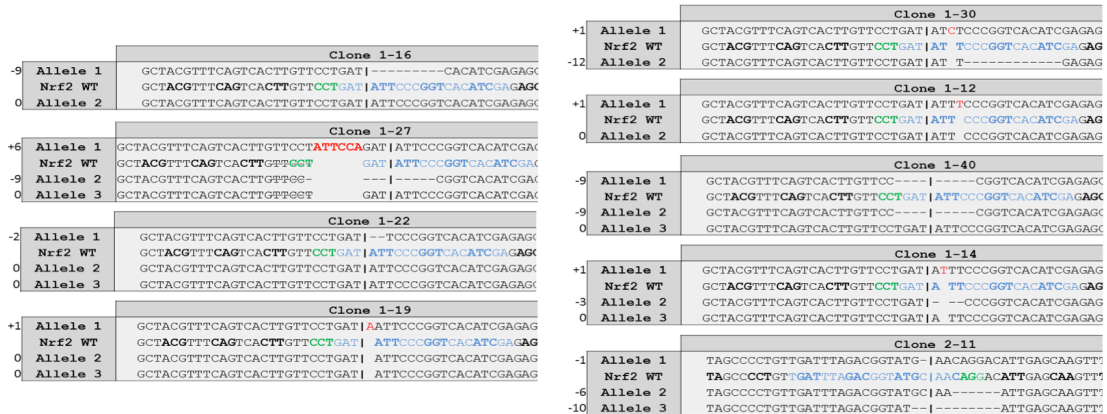

**Supplemental Figure S1. Allelic profiles of NRF2 KO clones.** A549 cells for NRF2 knockout by CRISPR/Cas9 were clonally isolated and genetically analyzed by Sanger sequencing and TIDE. Allelic Indel profiles for each clone are shown.

Supplemental Figure 2A

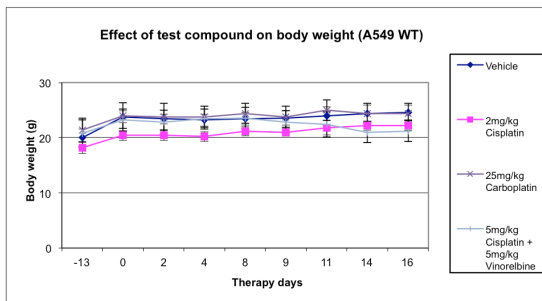

Supplemental Figure 2B

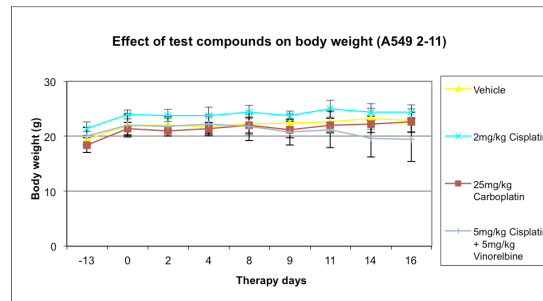

**Supplemental Figure S2. Effects of NRF2 KO and chemotherapy on body weight of xenograft mice.** Average body weights of mice treated with either saline, cisplatin, carboplatin or cisplatin and vinorelbine with wild type A549 (A) or NRF2 knockout A549 (B). Error bars represent  $\pm$  SD.
